# Supplementary material for: Plasma Free Amino Acid Profiling of Five Types of Cancer Patients and Its Application for Early Detection
Source: PLoS One. 2011 Sep 7;6(9):e24143. doi: 10.1371/journal.pone.0024143 (PMC3168486; doi:10.1371/journal.pone.0024143)
Supplement: Table S1 — Detailed demographic and clinical characteristics of subjects. a: p<0.05, c: p<0.001 *: For LC, GC, CRC, and BC, cancer stages were determined according to the International Union Against Cancer TNM Classification of Malignant Tumors, 6th edition [38], and for PC, cancer stages were determined according to Jewett staging system [39]. (XLS) [file pone.0024143.s002.xls]

## Sheet: Sheet1
Data set		LC		GC		CRC			BC		PC
		Patients	Contols	Patients	Contols	Patients	Contols	Polyp	Patients	Contols	Patients	Contols
Size	Total	200	996	199	985	199	995	34	196	976	134	666
	M/F	125/75	625/371	126/73	626/359	114/85	570/425	7/27	0/196	0/976	134/0	666/0
Age	Mean	65.0a	63.2	64.8a	62.9	63.7	62.4	55.3	55.3	54.5	69.4c	65.8
	(SD)	-10	-9.2	-10.8	-9.7	-9.5	-9.5	-7.9	-12.6	-11.1	-6.7	-6.1
BMI	Mean	22.5	22.9	22.7	22.8	23	22.8	24.5	22.4	22	23.4	23.4
	(SD)	-3.8	-3	-3.2	-3	-3.7	-3	-2.8	-3.4	-3.5	-2.7	-2.5
Smoking statuses	Never	60	536	58	514	101	547	14	126	775	30	228
	Ex	54	245	41	251	49	230		3	54	20	269
	Current	84	137	31	149	47	143	6	18	92	10	116
	Unknown	2	78	69	71	2	75	14	49	55	74	53
Stage*	0	-		-		8		26		-
	I (A)	101		120		63		75		0
	II (B)	16		29		48		73		95
	III (C)	54		26		59		13		19
	IV (D)	28		24		19		0		15
	Uncharacterized	1		0		2		9		5
Histology		Adenocarcinoma:133		Tubular adenocarinoma: 66		Tubular adenocarcinoma: 109			Ductal carcinoma in situ: 30		Gleason Score≦5: 7
		Squamous cell carcinoma: 35		Poorly differnciated adenocarcinoma: 53		Papilotubular adenocarcinoma: 6			Papillotubular carcinoma: 21		Gleason Score=6: 24
		Small cell carcinoma: 8		Signet ring cell carinoma: 26		Adenocarcinoma: 24			Solidtubular carcinoma: 22		Gleason Score=7: 42
		Other non-small cell lung cancer: 9		Mucocinous carcinoma: 3		Others: 4			Scirrhous carcinoma: 35		Gleason Score≧8: 39
		Uncharacterized: 15		Uncharacterized: 51		Uncharactrerized: 56			Others: 24		Uncharacterized: 22
									Uncharacterized: 64
a: p<0.05, c: p<0.001
* : For LC, GC, CRC, and BC, cancer stages were determined according to the International Union Against Cancer TNM Classification of Malignant Tumours, 6th edition [36], and for PC, cancer stages were determined according to Jewett staging system [37].
