# Supplementary material for: Plasma Free Amino Acid Profiling of Five Types of Cancer Patients and Its Application for Early Detection
Source: PLoS One. 2011 Sep 7;6(9):e24143. doi: 10.1371/journal.pone.0024143 (PMC3168486; doi:10.1371/journal.pone.0024143)
Supplement: Table S9 — Multiclass discriminant analyses of female cancer patients using ratios as explanatory variables. The numbers in the blanket indicate the results of LOOCV. (XLS) [file pone.0024143.s010.xls]

## Sheet: Sheet1
		Patients with:
		LC	GC	CRC	BC
Discriminated as:	LC	33(32)	14(14)	11(11)	43(44)
	GC	16(16)	38(33)	15(15)	32(33)
	CRC	4(4)	12(15)	48(45)	12(15)
	BC	22(23)	9(11)	11(14)	109(104)
	Total	75	73	85	196
	Accuracy	44.0%(42.7%)	52.1%(45.2%)	56.5%(52.9%)	55.6%(53.1%)
The numbers in the blanket indicate the results of LOOCV.
